# Supplementary material for: Application of regional meteorology and air quality models based on the microprocessor without interlocked piped stages (MIPS) and LoongArch CPU platforms
Source: Copernicus journal article supplement (doi:10.5194/gmd-17-4383-2024), 2024-05-24
Supplement: Supplementary file 1 [file gmd-17-4383-2024-supplement.pdf]

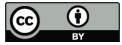

*Supplement of*

## **Application of regional meteorology and air quality models based on the microprocessor without interlocked piped stages (MIPS) and LoongArch CPU platforms**

**Zehua Bai et al.**

*Correspondence to:* Qizhong Wu ([wqizhong@bnu.edu.cn](mailto:wqizhong@bnu.edu.cn))

The copyright of individual parts of the supplement might differ from the article licence.

# Supplement

## Section S1 Station Map

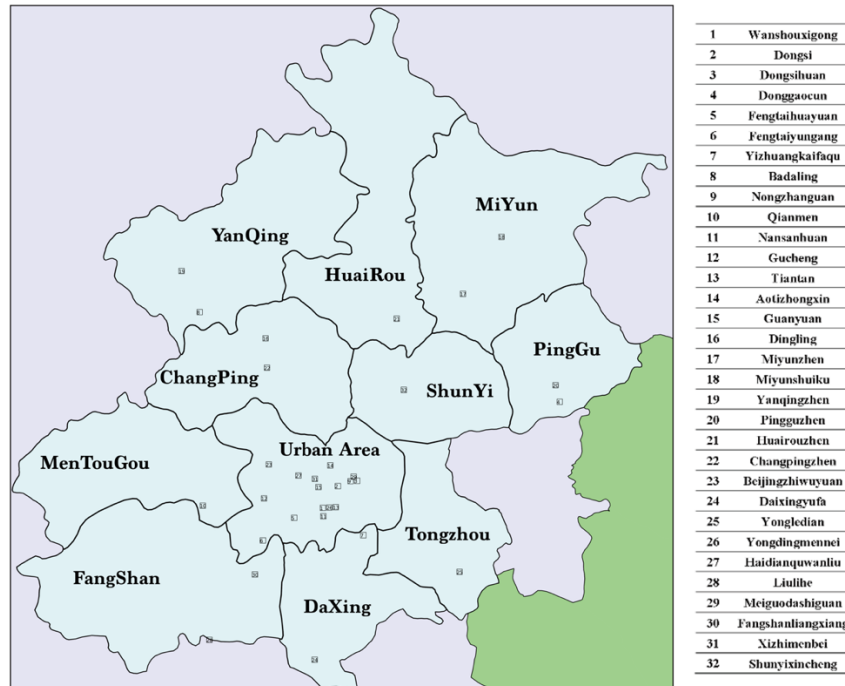

**Figure S1.** The positions of the 32 observation stations in Beijing are marked with numerical labels in the figure, covering both the urban area and the surrounding regions.

## Section S2 Elapsed time of CAMx model on MIPS and LoongArch platforms

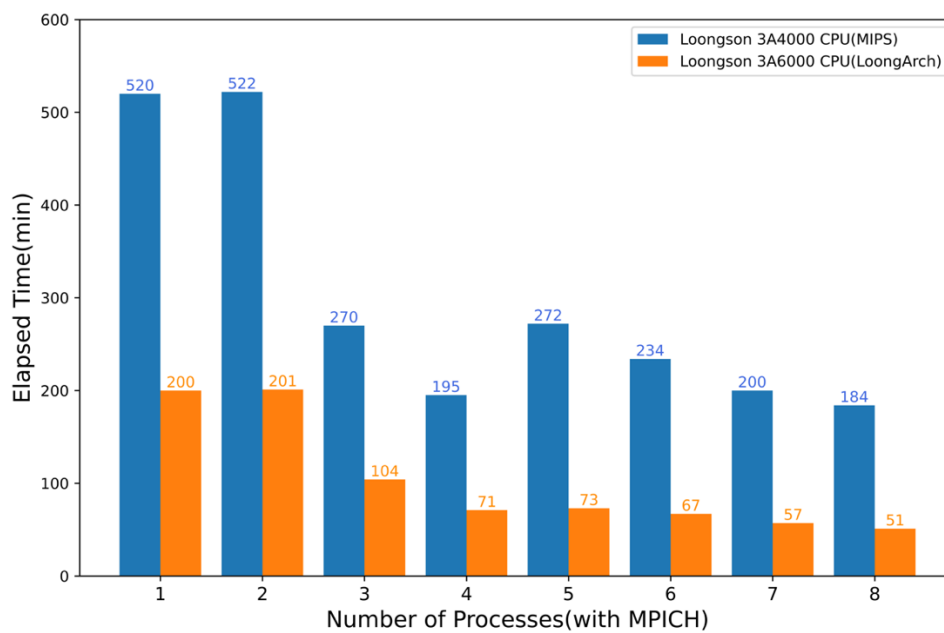

**Figure S2.** Elapsed time of CAMx model running simulation case with MPICH for 24 hours on the MIPS and LoongArch platforms.
